# Supplementary material for: Antibodies to SARS-CoV-2 protect against re-infection during outbreaks in care homes, September and October 2020
Source: PubMed Central journal article supplement (PMC7863231; doi:10.2807/1560-7917.es.2021.26.5.2100092), 2021-02-04
Supplement: 21-00092_Jeffery-Smith_Supplementary_Table.pdf [file 21-00092_Jeffery-Smith_Supplementary_Table.pdf]

This supplementary material is hosted by *Eurosurveillance* as supporting information alongside the article 'Antibodies to SARS-CoV-2 protect against reinfection during outbreaks in care homes, September and October 2020', on behalf of the authors, who remain responsible for the accuracy and appropriateness of the content. The same standards for ethics, copyright, attributions and permissions as for the article apply. Supplements are not edited by *Eurosurveillance* and the journal is not responsible for the maintenance of any links or email addresses provided therein.

**Supplementary Table.** Lineage allocation and GISAID Accession Number <sup>a</sup>

| <b>GISAID_accession</b> | <b>Lineage<br/>(Pangolin<br/>27/11/2020)</b> | <b>Care Home</b> | <b>UK Phylotype</b> |
|-------------------------|----------------------------------------------|------------------|---------------------|
| EPI_ISL_528408          | B.2.1                                        | A                | UK107_1             |
| EPI_ISL_528409          | B.2.1                                        | A                | UK107_1.132.1       |
| EPI_ISL_528410          | B.2.1                                        | A                | UK107_1.132         |
| EPI_ISL_527358          | B.2.1                                        | A                | UK107_1.132         |
| EPI_ISL_622833          | B.1.36.1                                     | A                | UK1350_1.2.1.1      |
| EPI_ISL_622834          | B.1.36                                       | A                | UK1350_1.2.1.1      |
| EPI_ISL_622835          | B.1.36.1                                     | A                | UK1350_1.2.1.1      |
| EPI_ISL_622836          | B.1.36.1s                                    | A                | UK1350_1.2.1.1      |
| EPI_ISL_622837          | B.1.36.1                                     | A                | UK1350_1.2.1.1      |
| EPI_ISL_622838          | B.1.36.1                                     | A                | UK1350_1.2.1.1      |
| EPI_ISL_622839          | B.1.36.1                                     | A                | UK1350_1.2.1.1      |
| EPI_ISL_622840          | B.1.36                                       | A                | UK1350_1.2.1.1      |
| EPI_ISL_622841          | B.1.36.1                                     | A                | UK1350_1.2.1.1      |
| EPI_ISL_622842          | B.1.36                                       | A                | UK1350_1.2.1.1      |
| EPI_ISL_609840          | B.1.36                                       | A                | UK1350_1.2.1.1      |
| EPI_ISL_609841          | B.1.36                                       | A                | UK1350_1.2.1.1      |
| EPI_ISL_609842          | B.1.36.1                                     | A                | UK1350_1.2.1.1      |
| EPI_ISL_609885          | B.1.1                                        | L                | UK2631_1            |

|                |       |   |                  |
|----------------|-------|---|------------------|
| EPI_ISL_609886 | B.1.1 | L | UK2631_1         |
| EPI_ISL_609887 | B.1.1 | L | UK2631_1         |
| EPI_ISL_609888 | B.1.1 | L | UK2631_1         |
| EPI_ISL_613571 | B.1.1 | L | UK2631_1         |
| EPI_ISL_613572 | B.1.1 | L | UK2631_1         |
| EPI_ISL_613573 | B.1.1 | L | UK2631_1         |
| EPI_ISL_613574 | B.1.1 | L | UK2631_1         |
| EPI_ISL_613575 | B.1.1 | L | UK2631_1         |
| EPI_ISL_609898 | B.1.1 | L | UK2631_1         |
| EPI_ISL_609901 | B.1.1 | L | UK2631_1         |
| EPI_ISL_613598 | B.1.1 | L | UK2631_1         |
| EPI_ISL_528430 | B     | L | UK473_1          |
| EPI_ISL_466479 | B.1.1 | L | UK2420_1.4       |
| EPI_ISL_466480 | B.1.1 | L | UK2420_1.4       |
| EPI_ISL_466481 | B.1.1 | L | UK2420_1.4       |
| EPI_ISL_466482 | B.1.1 | L | UK282_1          |
| EPI_ISL_466483 | B     | L | UK282_1.3.1.1    |
| EPI_ISL_466485 | B.1.1 | L | UK2420_1.4       |
| EPI_ISL_466486 | B.2.1 | L | UK282_1.3.1.1.47 |
| EPI_ISL_466487 | B.1.1 | L | UK3476_1.14      |
| EPI_ISL_466488 | B.1.1 | L | UK2420_1.4       |
| EPI_ISL_466489 | B.1.1 | L | UK2420_1.4       |
| EPI_ISL_466490 | B.1.1 | L | UK2420_1.4       |
| EPI_ISL_466491 | B.1.1 | L | UK3476_1.14      |

<sup>a</sup> Green highlighted genome from reinfection case.
